# Supplementary material for: Screening chronic kidney disease through deep learning utilizing ultra-wide-field fundus images
Source: PubMed Central journal article supplement — NPJ Digit Med. 2024 Oct 7;7:275. doi: 10.1038/s41746-024-01271-w (PMC11458603; doi:10.1038/s41746-024-01271-w), 2024-10-07
Supplement: 41746_2024_1271_MOESM1_ESM.pdf [file 41746_2024_1271_MOESM1_ESM.pdf]

**Supplementary Table 1. AI model's performance relative to the gold standard in the initial image quality screening process.**

|           |             | Standard  |             |     |
|-----------|-------------|-----------|-------------|-----|
|           |             | Qualified | Unqualified | Sum |
| Algorithm | Qualified   | 195       | 5           | 200 |
|           | Unqualified | 0         | 200         | 200 |
|           | Sum         | 195       | 205         | 400 |

The concordance of each expert with the gold standard showed the following rates: 99.5% for Expert 1, 99.75% for Expert 2, and 99.75% for Expert 3. The kappa between the algorithm and gold standard was 0.975.

**Supplementary Table 2. Multivariate logistic regression to analyze the demographic effects on the target variable CKD**

| Variable                | Coefficient | Standard Error | z-Value | P-value  | 95% Confidence Interval |
|-------------------------|-------------|----------------|---------|----------|-------------------------|
| Intercept               | -3.3439     | 0.044          | -76.388 | < 0.001* | (-3.430, -3.258)        |
| C(Male)                 | 0.4167      | 0.046          | 9.115   | < 0.001* | (0.327, 0.506)          |
| Age_z                   | 0.225       | 0.026          | 8.547   | < 0.001* | (0.173, 0.277)          |
| Diabetes                | 0.3919      | 0.051          | 7.613   | < 0.001* | (0.291, 0.493)          |
| Hypertension            | 1.4287      | 0.053          | 27.063  | < 0.001* | (1.325, 1.532)          |
| Cerebrovascular Disease | 0.4536      | 0.067          | 6.78    | < 0.001* | (0.323, 0.585)          |
| Coronary Heart Disease  | -0.0784     | 0.072          | -1.094  | 0.274    | (-0.219, 0.062)         |
| Dyslipidemia            | -0.0111     | 0.056          | -0.2    | 0.842    | (-0.120, 0.098)         |

\* indicates  $P < 0.05$

The result showed that sex, age, diabetes, hypertension, and cerebrovascular disease have

statistically significant associations with the prediction of CKD.

**Supplementary Table 3. Stratified comparisons on various subgroups that might impact the overall model performance.**

| Subgroup             | AUC    | Delta   | z       | p       |
|----------------------|--------|---------|---------|---------|
| All                  | 0.8603 | /       | /       | /       |
| Male                 | 0.8523 | 0.0081  | 0.2766  | 0.7821  |
| Female               | 0.8685 | -0.0081 | -0.2358 | 0.8136  |
| Age < 30             | 0.9637 | -0.1034 | -1.8337 | 0.0667  |
| Age ≥ 30             | 0.8288 | 0.0315  | 1.1866  | 0.2354  |
| Age < 70             | 0.8606 | -0.0003 | -0.0108 | 0.9914  |
| Age ≥ 70             | 0.8440 | 0.0163  | 0.3468  | 0.7288  |
| Diabetes             | 0.7592 | 0.1011  | 3.0218  | 0.0025* |
| Without Diabetes     | 0.8853 | -0.0249 | -0.8400 | 0.4009  |
| Hypertension         | 0.8362 | 0.0241  | 0.8077  | 0.4193  |
| Without Hypertension | 0.8063 | 0.0540  | 1.5411  | 0.1233  |
| CVD                  | 0.6876 | 0.1727  | 3.4315  | 0.0006* |
| Without CVD          | 0.8675 | -0.0072 | -0.2754 | 0.7830  |
| CHD                  | 0.8175 | 0.0428  | 0.6967  | 0.4860  |
| Without CHD          | 0.8620 | -0.0017 | -0.0662 | 0.9472  |
| Dyslipidemia         | 0.8587 | 0.0017  | 0.0449  | 0.9642  |
| Without Dyslipidemia | 0.8558 | 0.0046  | 0.1643  | 0.8695  |

AUC = Area under the receiver operating characteristic curve.

In the subgroup of diabetes and cerebrovascular disease, the model's AUC value showed a statistically significant difference ( $P < 0.05$ ) compared to the overall sample, suggesting that the two diseases may affect the model's predictive performance.

**Supplementary table 4. The AUCs of UWF-CKDS trained with original unmatched dataset, age matched dataset, and PSM dataset.**

|                     | <b>Internal test</b> | <b>Multi-center test</b> |
|---------------------|----------------------|--------------------------|
| Unmatched dataset   | 0.86                 | 0.81                     |
| Age Matched dataset | 0.79                 | 0.68                     |
| PSM dataset         | 0.81                 | 0.70                     |

AUC = Area under the receiver operating characteristic curve. PSM = Propensity score matching.

**Supplementary Table 5. Performance comparison between different AI algorithms for training UWF-CKDS.**

| <b>Archite</b> | <b>Internal</b> | <b>Intern</b> | <b>Intern</b> | <b>Inter</b> | <b>Multi</b>     | <b>Multi</b>  | <b>Multi</b>     | <b>Multi</b>  |
|----------------|-----------------|---------------|---------------|--------------|------------------|---------------|------------------|---------------|
| <b>ctures</b>  | <b>preci</b>    | <b>al</b>     | <b>al F1</b>  | <b>nal</b>   | <b>center</b>    | <b>center</b> | <b>center F1</b> | <b>center</b> |
|                | <b>on</b>       | <b>recall</b> |               | <b>AUC</b>   | <b>precision</b> | <b>recall</b> |                  | <b>AUC</b>    |
| Efficien       | 0.235           | 0.771         | 0.360         | 0.860        | 0.217            | 0.860         | 0.347            | 0.818         |
| tnet--B3       |                 |               |               |              |                  |               |                  |               |
| Resnet5        | 0.187           | 0.786         | 0.303         | 0.810        | 0.186            | 0.850         | 0.305            | 0.776         |
| 0              |                 |               |               |              |                  |               |                  |               |
| Vit            | 0.186           | 0.836         | 0.304         | 0.816        | 0.173            | 0.879         | 0.290            | 0.761         |

AUC = Area under the receiver operating characteristic curve.

**Supplementary Figure 1. Confusion matrix for both the internal test set and external test set.**

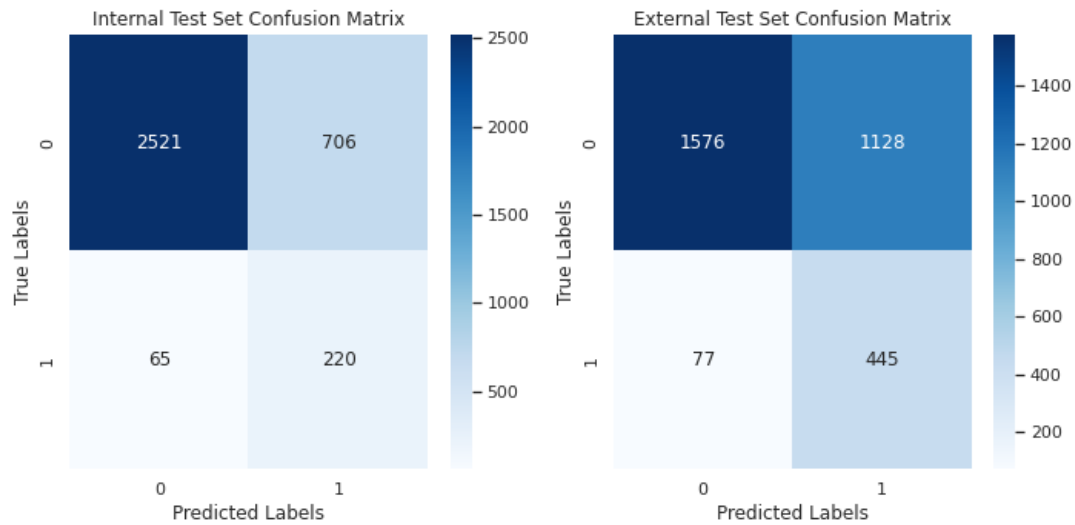

Based on the analysis of the confusion matrix, the classification model demonstrated a higher sensitivity and a relatively lower specificity. Given the objectives of early and large-scale screening and detection of CKD, reducing false negatives, sensitivity is deemed to be of greater importance than specificity within the context of our study.

**Supplementary Note 1. List of 23 participated hospitals across China**

1. Peking Union Medical College Hospital (PUMCH), Beijing
2. Beijing Tsinghua Changgung Hospital, Beijing
3. Beijing Tiantan Hospital, Beijing
4. Eye Hospital of Shandong First Medical University, Shandong Province
5. Tonghua Eye Hospital of Jilin Province, Jilin Province
6. Guangdong Provincial People's Hospital, Guangdong Province
7. Guizhou Provincial People's Hospital, Guizhou Province
8. Hunan Provincial People's Hospital, Hunan Province
9. The Fourth People's Hospital of Shenyang, Liaoning Province
10. The Affiliated Hospital of Chengde Medical University, Hebei Province
11. The Second Affiliated Hospital of Hebei North University, Hebei Province
12. Xi'an NO. 1 Hospital, Shanxi Province

13. The First Affiliated Hospital of Kunming Medical University, Yunnan Province
14. Renmin Hospital of Wuhan University, Hubei Province
15. The First Hospital of China Medical University, Liaoning Province
16. Bayinguoleng people's Hospital, Xinjiang Province
17. The Affiliated Hospital of Inner Mongolia Medical University, Inner Mongolia Autonomous Region
18. Hainan Hospital of PLA General Hospital, Hainan Province
19. The Second Affiliated Hospital of Harbin Medical University, Heilongjiang Province
20. The First Affiliated Hospital of Zhengzhou University, Henan Province
21. Fujian Medical University Union Hospital, Fujian Province
22. The First Affiliated Hospital of Shanxi Medical University, Shanxi Province
23. The Affiliated Hospital of Southwest Medical University, Sichuan Province
